# Supplementary material
Source: Research Square preprint supplement (doi:10.21203/rs.3.rs-9337587/v1)
Supplement: Supplementary file 1 [file 75cc4421a05b5d473961b307.pdf]

Table S1. Proportional composition of colony health states, including healthy, stressed colonies

| Time      | Site          | n   | Healthy | SCTLD | Stressed | Dead | Others_diseased |
|-----------|---------------|-----|---------|-------|----------|------|-----------------|
| Sept_2019 | Acuario 2     | 372 | 339     | 0     | 32       | 0    | 1               |
| Sept_2019 | C. Glenview   | 239 | 216     | 0     | 18       | 3    | 2               |
| Sept_2019 | El Quebradote | 239 | 217     | 0     | 18       | 0    | 4               |
| Sept_2019 | El ángel      | 290 | 248     | 0     | 40       | 0    | 2               |
| Sept_2019 | Far Star      | 225 | 204     | 0     | 19       | 0    | 2               |
| Sept_2019 | Isla Che      | 212 | 200     | 0     | 8        | 2    | 2               |
| Sept_2019 | La Baliza 2   | 268 | 244     | 0     | 15       | 3    | 6               |
| Sept_2019 | MX3082        | 229 | 210     | 0     | 12       | 1    | 6               |
| May_2023  | Acuario 2     | 349 | 323     | 12    | 10       | 4    | 0               |
| May_2023  | C. Glenview   | 306 | 202     | 57    | 30       | 17   | 0               |
| May_2023  | El Quebradote | 302 | 262     | 21    | 11       | 8    | 0               |
| May_2023  | El ángel      | 269 | 243     | 19    | 3        | 3    | 1               |
| May_2023  | Far Star      | 281 | 244     | 27    | 7        | 3    | 0               |
| May_2023  | Isla Che      | 285 | 258     | 16    | 4        | 7    | 0               |
| May_2023  | La Baliza 2   | 279 | 237     | 26    | 10       | 6    | 0               |
| May_2023  | MX3082        | 202 | 177     | 19    | 1        | 3    | 2               |
| Nov_2024  | Acuario 2     | 304 | 191     | 2     | 110      | 0    | 0               |
| Nov_2024  | C. Glenview   | 91  | 89      | 0     | 2        | 0    | 0               |
| Nov_2024  | El Quebradote | 119 | 95      | 0     | 24       | 0    | 0               |
| Nov_2024  | El ángel      | 135 | 44      | 1     | 76       | 0    | 0               |
| Nov_2024  | Far Star      | 153 | 140     | 0     | 13       | 0    | 0               |
| Nov_2024  | Isla Che      | 201 | 157     | 0     | 43       | 0    | 0               |
| Nov_2024  | La Baliza 2   | 182 | 61      | 2     | 113      | 0    | 0               |
| Nov_2024  | MX3082        | 247 | 124     | 1     | 115      | 0    | 0               |
| Aug_2025  | Acuario 2     | 188 | 151     | 0     | 26       | 0    | 11              |
| Aug_2025  | El Quebradote | 123 | 89      | 0     | 30       | 0    | 4               |
| Aug_2025  | El ángel      | 124 | 98      | 0     | 23       | 0    | 3               |
| Aug_2025  | Far Star      | 96  | 92      | 0     | 3        | 0    | 1               |
| Aug_2025  | Isla Che      | 150 | 118     | 0     | 24       | 0    | 8               |
| Aug_2025  | La Baliza 2   | 158 | 127     | 0     | 17       | 0    | 14              |
| Aug_2025  | MX3082        | 150 | 107     | 0     | 28       | 1    | 14              |
