# Supplementary material
Source: Research Square preprint supplement (doi:10.21203/rs.3.rs-9337587/v1)
Supplement: Supplementary file 2 [file d5a9f2a7aba468bbd95d2e59.pdf]

## Supplementary material

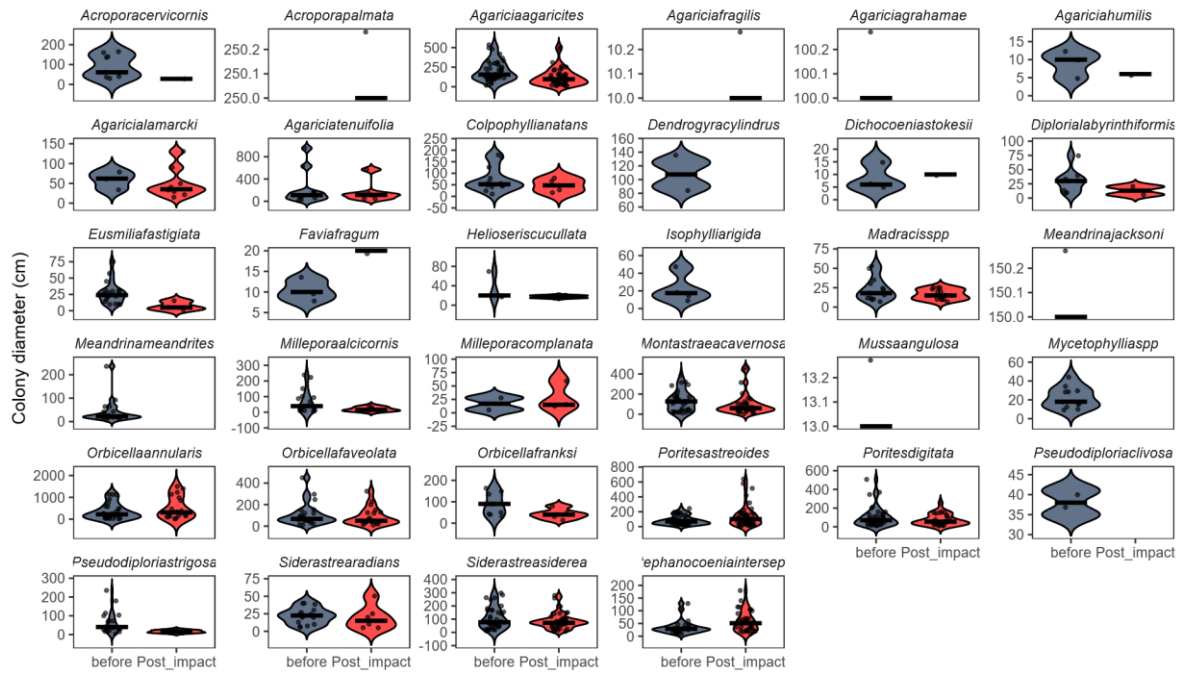

Supplementary Figure 1. Change in colony diameter before and after combined SCTLD-thermal stress impact across all species. Colors denote monitoring periods: September 2019 (blue) and November 2024 (red).

Table 1. Non-parametric analysis of differences in colony density between periods: Kruskal–Wallis test and Dunn post-hoc contrasts with Bonferroni correction

| <i>Time</i>           | <i>p_value</i> | <i>W</i>  | <i>Comparison</i>              | <i>Z</i>   | <i>P.unadj</i> | <i>P.adj</i> |
|-----------------------|----------------|-----------|--------------------------------|------------|----------------|--------------|
| <i>September 2019</i> | 6.37E-01       | 0.9800844 | September 2019 - May 2023      | -1.3617748 | 0.17326897     | 1            |
|                       | 3.09E-07       | 0.8111813 | September 2019 - November 2024 | 5.11296314 | 3.1714E-07     | 1.9029E-06   |
| <i>May 2023</i>       |                |           |                                |            |                |              |
| <i>November 2024</i>  | 1.12E-02       | 0.9357881 | May 2023 - November 2024       | 6.88551401 | 5.7579E-12     | 3.4548E-11   |
| <i>August 2025</i>    | 1.89E-03       | 0.8687019 | September 2019 - August 2025   | 3.36856247 | 0.00075561     | 0.00453368   |
|                       |                |           | May 2023 - August 2025         | 4.74881393 | 2.0461E-06     | 1.2277E-05   |
|                       |                |           | November 2024- August 2025     | -1.1115178 | 0.26634554     | 1            |

Table 2. PERMANOVA was used to test differences in community structure among time periods. Betadisper assessed homogeneity of dispersion among time periods.

|                 | <i>Df</i> | <i>Sum of Squares</i> | <i>R</i> <sup>2</sup> | <i>F</i> | <i>p-value</i> |
|-----------------|-----------|-----------------------|-----------------------|----------|----------------|
| <i>Time</i>     | 1         | 1.162                 | 0.09455               | 9.3986   | <b>0.001*</b>  |
|                 | 90        | 11.127                | 0.90545               | —        | —              |
| <i>Residual</i> |           |                       |                       |          |                |
| <i>Total</i>    | 91        | 12.289                | 1                     | —        | —              |

Table 3. Non-parametric analysis of differences in coral communities calcification between periods: Kruskal–Wallis test and Dunn post-hoc contrasts with Bonferroni correction

| <i>Tiempo</i>         | <i>p_value</i> | <i>W</i>  | <i>Comparison</i>              | <i>Z</i>   | <i>P.unadj</i> | <i>P.adj</i> |
|-----------------------|----------------|-----------|--------------------------------|------------|----------------|--------------|
| <i>September 2019</i> | 8.55E-09       | 0.6625946 | September 2019 - May 2023      | -1.3617748 | 0.17326897     | 1            |
| <i>May 2023</i>       | 5.34E-10       | 0.6140452 | September 2019 - November 2024 | 5.11296314 | 3.1714E-07     | 1.9029E-06   |
| <i>November 2024</i>  | 4.58E-11       | 0.5382589 | May 2023 - November 2024       | 6.88551401 | 5.7579E-12     | 3.4548E-11   |
| <i>August 2025</i>    | 4.07E-10       | 0.3863947 | September 2019 - August 2025   | 3.36856247 | 0.00075561     | 0.00453368   |
|                       |                |           | May 2023 - Secuelas2025        | 4.74881393 | 2.0461E-06     | 1.2277E-05   |
|                       |                |           | November 2024- August 2025     | -1.1115178 | 0.26634554     | 1            |
