# Supplementary material
Source: Research Square preprint supplement (doi:10.21203/rs.3.rs-9337587/v1)
Supplement: Supplementary file 3 [file e41dd00813725037fd7fab60.pdf]

Table S2. Colony density (colonies m<sup>2</sup>) among periods

| Time      | Site          | <i>Acroporacervicornis</i> | <i>Acroporapalmata</i> | <i>Agariciagaricites</i> | <i>Agariciafragilis</i> | <i>Agariciagrahamae</i> | <i>Agariciahumilis</i> | <i>Agariciatamarcki</i> | <i>Agariciatenuifolia</i> | <i>Colpophyllianatans</i> | <i>Dendrogyracylindrus</i> | <i>Dichocoenastokesii</i> | <i>Diplorialabyrinthiformis</i> | <i>Eusmilifastigiata</i> | <i>Faviafragum</i> | <i>Heliosericucullata</i> | <i>Isophylliarigida</i> | <i>Isophylliasinuosa</i> | <i>Madracis</i> spp | <i>Meandrinajacksoni</i> | <i>Meandrinameandrites</i> | <i>Milleporaalcicornis</i> | <i>Milleporacomplanata</i> | <i>Montastraeaavernosa</i> | <i>Mussaangulosa</i> | <i>Mycetophylliaspp</i> | <i>Orbicellaammularis</i> | <i>Orbicellafaveolata</i> | <i>Orbicellafranksi</i> | <i>Poritesastreoides</i> | <i>Poritesdigitata</i> | <i>Pseudodiploriaclivosa</i> | <i>Pseudodiploriastrigosa</i> | <i>Siderastreaadians</i> | <i>Siderastreaidea</i> | <i>Stephanocoenitaintersepta</i> |
|-----------|---------------|----------------------------|------------------------|--------------------------|-------------------------|-------------------------|------------------------|-------------------------|---------------------------|---------------------------|----------------------------|---------------------------|---------------------------------|--------------------------|--------------------|---------------------------|-------------------------|--------------------------|---------------------|--------------------------|----------------------------|----------------------------|----------------------------|----------------------------|----------------------|-------------------------|---------------------------|---------------------------|-------------------------|--------------------------|------------------------|------------------------------|-------------------------------|--------------------------|------------------------|----------------------------------|
| Sept_2019 | Acuario 2     | 0.00                       | 0.00                   | 2.40                     | 0.00                    | 0.00                    | 0.00                   | 0.02                    | 0.03                      | 0.00                      | 0.00                       | 0.02                      | 0.10                            | 0.00                     | 0.00               | 0.05                      | 0.00                    | 0.02                     | 0.00                | 0.18                     | 0.03                       | 0.00                       | 0.40                       | 0.00                       | 0.03                 | 0.27                    | 0.10                      | 0.08                      | 0.43                    | 0.42                     | 0.00                   | 0.05                         | 0.20                          | 0.95                     | 0.42                   |                                  |
| Sept_2019 | C. Glenview   | 0.10                       | 0.00                   | 1.38                     | 0.00                    | 0.00                    | 0.04                   | 0.06                    | 0.00                      | 0.00                      | 0.04                       | 0.00                      | 0.02                            | 0.00                     | 0.00               | 0.02                      | 0.00                    | 0.08                     | 0.06                | 0.04                     | 0.34                       | 0.00                       | 0.46                       | 0.00                       | 0.00                 | 0.02                    | 0.06                      | 0.00                      | 0.80                    | 0.12                     | 0.00                   | 0.18                         | 0.08                          | 0.70                     | 0.12                   |                                  |
| Sept_2019 | El Quebradote | 0.00                       | 0.00                   | 1.20                     | 0.00                    | 0.00                    | 0.00                   | 0.00                    | 0.00                      | 0.03                      | 0.00                       | 0.00                      | 0.05                            | 0.00                     | 0.05               | 0.02                      | 0.00                    | 0.02                     | 0.00                | 0.08                     | 0.02                       | 0.00                       | 0.32                       | 0.00                       | 0.03                 | 0.12                    | 0.07                      | 0.07                      | 0.68                    | 0.33                     | 0.00                   | 0.02                         | 0.17                          | 0.57                     | 0.15                   |                                  |
| Sept_2019 | El ángel      | 0.15                       | 0.00                   | 0.77                     | 0.00                    | 0.00                    | 0.03                   | 0.00                    | 0.88                      | 0.02                      | 0.00                       | 0.00                      | 0.02                            | 0.02                     | 0.00               | 0.00                      | 0.00                    | 0.02                     | 0.00                | 0.00                     | 0.25                       | 0.02                       | 0.00                       | 0.00                       | 0.00                 | 0.77                    | 0.10                      | 0.05                      | 0.78                    | 0.85                     | 0.00                   | 0.05                         | 0.00                          | 0.07                     | 0.00                   |                                  |
| Sept_2019 | Far Star      | 0.00                       | 0.00                   | 0.86                     | 0.00                    | 0.00                    | 0.00                   | 0.00                    | 0.06                      | 0.00                      | 0.02                       | 0.04                      | 0.00                            | 0.00                     | 0.04               | 0.00                      | 0.02                    | 0.00                     | 0.02                | 0.00                     | 0.04                       | 0.60                       | 0.00                       | 0.16                       | 0.00                 | 0.00                    | 0.00                      | 0.06                      | 0.00                    | 1.48                     | 0.16                   | 0.02                         | 0.18                          | 0.08                     | 0.62                   | 0.04                             |
| Sept_2019 | Isla Che      | 0.00                       | 0.00                   | 0.95                     | 0.00                    | 0.00                    | 0.00                   | 0.00                    | 0.00                      | 0.03                      | 0.00                       | 0.02                      | 0.00                            | 0.12                     | 0.00               | 0.00                      | 0.00                    | 0.03                     | 0.00                | 0.02                     | 0.30                       | 0.02                       | 0.78                       | 0.00                       | 0.10                 | 0.18                    | 0.03                      | 0.03                      | 0.27                    | 0.12                     | 0.03                   | 0.07                         | 0.07                          | 0.23                     | 0.10                   |                                  |
| Sept_2019 | La Baliza 2   | 0.00                       | 0.00                   | 2.00                     | 0.00                    | 0.02                    | 0.00                   | 0.04                    | 0.00                      | 0.10                      | 0.00                       | 0.00                      | 0.02                            | 0.10                     | 0.02               | 0.00                      | 0.00                    | 0.14                     | 0.00                | 0.36                     | 0.00                       | 0.00                       | 0.68                       | 0.02                       | 0.00                 | 0.06                    | 0.06                      | 0.24                      | 0.34                    | 0.10                     | 0.00                   | 0.02                         | 0.04                          | 0.76                     | 0.18                   |                                  |
| Sept_2019 | MX3082        | 0.12                       | 0.00                   | 0.84                     | 0.00                    | 0.00                    | 0.00                   | 0.00                    | 0.04                      | 0.04                      | 0.00                       | 0.00                      | 0.10                            | 0.10                     | 0.00               | 0.02                      | 0.00                    | 0.02                     | 0.00                | 0.06                     | 0.18                       | 0.00                       | 0.22                       | 0.00                       | 0.06                 | 0.78                    | 0.14                      | 0.00                      | 0.44                    | 0.74                     | 0.00                   | 0.14                         | 0.02                          | 0.44                     | 0.06                   |                                  |
| May_2023  | Acuario 2     | 0.00                       | 0.00                   | 1.33                     | 0.00                    | 0.00                    | 0.00                   | 0.00                    | 0.00                      | 0.06                      | 0.00                       | 0.00                      | 0.01                            | 0.09                     | 0.00               | 0.00                      | 0.00                    | 0.00                     | 0.00                | 0.17                     | 0.00                       | 0.00                       | 0.64                       | 0.00                       | 0.00                 | 0.03                    | 0.14                      | 0.03                      | 0.23                    | 0.30                     | 0.00                   | 0.06                         | 0.27                          | 0.94                     | 0.63                   |                                  |
| May_2023  | C. Glenview   | 0.00                       | 0.00                   | 1.45                     | 0.00                    | 0.00                    | 0.00                   | 0.00                    | 0.00                      | 0.00                      | 0.00                       | 0.00                      | 0.02                            | 0.02                     | 0.00               | 0.00                      | 0.00                    | 0.07                     | 0.00                | 0.00                     | 0.38                       | 0.00                       | 0.15                       | 0.00                       | 0.00                 | 0.00                    | 0.07                      | 0.00                      | 1.10                    | 0.08                     | 0.00                   | 0.12                         | 0.10                          | 1.08                     | 0.18                   |                                  |
| May_2023  | El Quebradote | 0.00                       | 0.00                   | 1.34                     | 0.00                    | 0.00                    | 0.01                   | 0.01                    | 0.00                      | 0.04                      | 0.00                       | 0.03                      | 0.00                            | 0.03                     | 0.00               | 0.03                      | 0.00                    | 0.01                     | 0.03                | 0.01                     | 0.03                       | 0.01                       | 0.00                       | 0.40                       | 0.00                 | 0.00                    | 0.03                      | 0.04                      | 0.67                    | 0.49                     | 0.00                   | 0.00                         | 0.06                          | 0.77                     | 0.14                   |                                  |
| May_2023  | El ángel      | 0.02                       | 0.00                   | 1.22                     | 0.02                    | 0.00                    | 0.00                   | 0.05                    | 0.38                      | 0.00                      | 0.00                       | 0.00                      | 0.00                            | 0.00                     | 0.00               | 0.00                      | 0.00                    | 0.03                     | 0.00                | 0.00                     | 0.08                       | 0.00                       | 0.02                       | 0.00                       | 0.00                 | 0.37                    | 0.12                      | 0.02                      | 0.80                    | 1.18                     | 0.00                   | 0.00                         | 0.00                          | 0.12                     | 0.02                   |                                  |
| May_2023  | Far Star      | 0.00                       | 0.00                   | 1.47                     | 0.00                    | 0.00                    | 0.02                   | 0.00                    | 0.02                      | 0.00                      | 0.02                       | 0.05                      | 0.00                            | 0.00                     | 0.00               | 0.00                      | 0.00                    | 0.00                     | 0.00                | 0.00                     | 0.20                       | 0.02                       | 0.03                       | 0.00                       | 0.00                 | 0.02                    | 0.05                      | 0.00                      | 2.17                    | 0.10                     | 0.00                   | 0.07                         | 0.03                          | 0.35                     | 0.03                   |                                  |
| May_2023  | Isla Che      | 0.00                       | 0.00                   | 1.15                     | 0.00                    | 0.00                    | 0.00                   | 0.00                    | 0.00                      | 0.02                      | 0.02                       | 0.03                      | 0.05                            | 0.13                     | 0.00               | 0.00                      | 0.00                    | 0.05                     | 0.00                | 0.02                     | 0.03                       | 0.00                       | 1.02                       | 0.00                       | 0.02                 | 0.12                    | 0.23                      | 0.00                      | 0.57                    | 0.20                     | 0.00                   | 0.07                         | 0.12                          | 0.42                     | 0.38                   |                                  |
| May_2023  | La Baliza 2   | 0.00                       | 0.00                   | 2.23                     | 0.00                    | 0.02                    | 0.00                   | 0.00                    | 0.00                      | 0.05                      | 0.00                       | 0.00                      | 0.00                            | 0.10                     | 0.00               | 0.00                      | 0.00                    | 0.07                     | 0.00                | 0.08                     | 0.00                       | 0.00                       | 0.50                       | 0.00                       | 0.00                 | 0.10                    | 0.12                      | 0.12                      | 0.22                    | 0.00                     | 0.02                   | 0.00                         | 0.00                          | 0.85                     | 0.08                   |                                  |
| May_2023  | MX3082        | 0.03                       | 0.00                   | 1.15                     | 0.00                    | 0.00                    | 0.00                   | 0.13                    | 0.08                      | 0.00                      | 0.00                       | 0.10                      | 0.15                            | 0.00                     | 0.00               | 0.00                      | 0.00                    | 0.10                     | 0.00                | 0.00                     | 0.15                       | 0.00                       | 0.33                       | 0.00                       | 0.03                 | 0.53                    | 0.18                      | 0.00                      | 0.55                    | 0.40                     | 0.00                   | 0.15                         | 0.00                          | 0.85                     | 0.10                   |                                  |
| Nov_2024  | Acuario 2     | 0.00                       | 0.00                   | 0.98                     | 0.00                    | 0.00                    | 0.00                   | 0.06                    | 0.00                      | 0.01                      | 0.00                       | 0.00                      | 0.01                            | 0.00                     | 0.00               | 0.01                      | 0.00                    | 0.07                     | 0.00                | 0.00                     | 0.00                       | 0.00                       | 0.16                       | 0.00                       | 0.00                 | 0.09                    | 0.11                      | 0.03                      | 0.45                    | 0.13                     | 0.00                   | 0.01                         | 0.05                          | 0.31                     | 0.26                   |                                  |
| Nov_2024  | C. Glenview   | 0.00                       | 0.00                   | 0.10                     | 0.00                    | 0.00                    | 0.00                   | 0.02                    | 0.00                      | 0.00                      | 0.00                       | 0.00                      | 0.00                            | 0.00                     | 0.00               | 0.00                      | 0.00                    | 0.00                     | 0.00                | 0.00                     | 0.00                       | 0.00                       | 0.04                       | 0.00                       | 0.00                 | 0.02                    | 0.02                      | 0.00                      | 0.82                    | 0.00                     | 0.00                   | 0.02                         | 0.00                          | 0.48                     | 0.30                   |                                  |
| Nov_2024  | El Quebradote | 0.00                       | 0.00                   | 0.48                     | 0.00                    | 0.00                    | 0.00                   | 0.02                    | 0.00                      | 0.00                      | 0.00                       | 0.02                      | 0.00                            | 0.00                     | 0.00               | 0.00                      | 0.00                    | 0.02                     | 0.00                | 0.00                     | 0.00                       | 0.00                       | 0.25                       | 0.00                       | 0.00                 | 0.02                    | 0.05                      | 0.00                      | 0.42                    | 0.33                     | 0.00                   | 0.02                         | 0.02                          | 0.23                     | 0.12                   |                                  |
| Nov_2024  | El ángel      | 0.04                       | 0.02                   | 0.32                     | 0.00                    | 0.00                    | 0.00                   | 0.24                    | 0.00                      | 0.00                      | 0.00                       | 0.00                      | 0.02                            | 0.08                     | 0.04               | 0.00                      | 0.00                    | 0.02                     | 0.00                | 0.00                     | 0.02                       | 0.00                       | 0.00                       | 0.00                       | 0.00                 | 0.12                    | 0.02                      | 0.06                      | 1.18                    | 0.28                     | 0.00                   | 0.00                         | 0.00                          | 0.06                     | 0.00                   |                                  |
| Nov_2024  | Far Star      | 0.00                       | 0.00                   | 0.04                     | 0.00                    | 0.00                    | 0.00                   | 0.00                    | 0.00                      | 0.00                      | 0.00                       | 0.00                      | 0.00                            | 0.00                     | 0.00               | 0.00                      | 0.00                    | 0.00                     | 0.00                | 0.00                     | 0.00                       | 0.00                       | 0.00                       | 0.00                       | 0.00                 | 0.00                    | 0.00                      | 0.00                      | 2.76                    | 0.02                     | 0.00                   | 0.02                         | 0.00                          | 0.18                     | 0.04                   |                                  |
| Nov_2024  | Isla Che      | 0.00                       | 0.00                   | 0.53                     | 0.00                    | 0.00                    | 0.00                   | 0.00                    | 0.00                      | 0.02                      | 0.00                       | 0.00                      | 0.02                            | 0.00                     | 0.00               | 0.00                      | 0.00                    | 0.03                     | 0.00                | 0.00                     | 0.02                       | 0.00                       | 0.80                       | 0.00                       | 0.00                 | 0.15                    | 0.10                      | 0.00                      | 0.58                    | 0.22                     | 0.00                   | 0.00                         | 0.02                          | 0.35                     | 0.50                   |                                  |
| Nov_2024  | La Baliza 2   | 0.00                       | 0.00                   | 1.73                     | 0.00                    | 0.00                    | 0.00                   | 0.05                    | 0.00                      | 0.05                      | 0.00                       | 0.00                      | 0.03                            | 0.00                     | 0.00               | 0.00                      | 0.00                    | 0.05                     | 0.00                | 0.00                     | 0.00                       | 0.03                       | 0.30                       | 0.00                       | 0.00                 | 0.00                    | 0.10                      | 0.05                      | 0.55                    | 0.00                     | 0.00                   | 0.00                         | 0.03                          | 1.20                     | 0.40                   |                                  |
| Nov_2024  | MX3082        | 0.00                       | 0.00                   | 0.48                     | 0.02                    | 0.00                    | 0.02                   | 0.00                    | 0.05                      | 0.02                      | 0.00                       | 0.00                      | 0.02                            | 0.00                     | 0.00               | 0.00                      | 0.00                    | 0.03                     | 0.00                | 0.00                     | 0.10                       | 0.03                       | 0.12                       | 0.00                       | 0.00                 | 1.03                    | 0.13                      | 0.00                      | 0.95                    | 0.65                     | 0.00                   | 0.00                         | 0.00                          | 0.32                     | 0.13                   |                                  |
| Aug_2025  | Acuario 2     | 0.00                       | 0.00                   | 0.73                     | 0.00                    | 0.00                    | 0.00                   | 0.01                    | 0.00                      | 0.00                      | 0.00                       | 0.00                      | 0.01                            | 0.00                     | 0.00               | 0.00                      | 0.01                    | 0.00                     | 0.01                | 0.01                     | 0.01                       | 0.00                       | 0.11                       | 0.00                       | 0.00                 | 0.01                    | 0.03                      | 0.04                      | 0.47                    | 0.26                     | 0.00                   | 0.00                         | 0.06                          | 0.49                     | 0.41                   |                                  |
| Aug_2025  | El Quebradote | 0.00                       | 0.00                   | 0.85                     | 0.00                    | 0.00                    | 0.00                   | 0.00                    | 0.03                      | 0.00                      | 0.00                       | 0.00                      | 0.03                            | 0.00                     | 0.00               | 0.00                      | 0.00                    | 0.00                     | 0.03                | 0.03                     | 0.03                       | 0.00                       | 0.18                       | 0.00                       | 0.03                 | 0.00                    | 0.03                      | 0.05                      | 0.75                    | 0.33                     | 0.00                   | 0.00                         | 0.08                          | 0.53                     | 0.18                   |                                  |
| Aug_2025  | El ángel      | 0.00                       | 0.00                   | 0.33                     | 0.00                    | 0.00                    | 0.00                   | 0.03                    | 0.03                      | 0.00                      | 0.00                       | 0.00                      | 0.00                            | 0.00                     | 0.00               | 0.00                      | 0.03                    | 0.00                     | 0.03                | 0.10                     | 0.00                       | 0.13                       | 0.00                       | 0.00                       | 0.23                 | 0.03                    | 0.00                      | 1.55                      | 0.35                    | 0.00                     | 0.00                   | 0.05                         | 0.18                          | 0.08                     |                        |                                  |
| Aug_2025  | Far Star      | 0.00                       | 0.00                   | 0.20                     | 0.00                    | 0.00                    | 0.00                   | 0.00                    | 0.00                      | 0.00                      | 0.00                       | 0.00                      | 0.00                            | 0.00                     | 0.00               | 0.00                      | 0.00                    | 0.03                     | 0.00                | 0.00                     | 0.10                       | 0.00                       | 0.03                       | 0.00                       | 0.00                 | 0.00                    | 0.00                      | 0.00                      | 2.60                    | 0.00                     | 0.00                   | 0.00                         | 0.03                          | 0.20                     | 0.00                   |                                  |
| Aug_2025  | Isla Che      | 0.00                       | 0.00                   | 0.43                     | 0.08                    | 0.00                    | 0.00                   | 0.00                    | 0.00                      | 0.00                      | 0.00                       | 0.00                      | 0.08                            | 0.00                     | 0.00               | 0.00                      | 0.00                    | 0.05                     | 0.00                | 0.00                     | 0.15                       | 0.00                       | 0.50                       | 0.00                       | 0.05                 | 0.38                    | 0.03                      | 0.00                      | 1.03                    | 0.18                     | 0.00                   | 0.03                         | 0.15                          | 0.28                     | 0.38                   |                                  |
| Aug_2025  | La Baliza 2   | 0.00                       | 0.00                   | 1.58                     | 0.00                    | 0.00                    | 0.00                   | 0.08                    | 0.00                      | 0.00                      | 0.00                       | 0.00                      | 0.08                            | 0.00                     | 0.00               | 0.00                      | 0.00                    | 0.05                     | 0.00                | 0.00                     | 0.00                       | 0.00                       | 0.50                       | 0.00                       | 0.00                 | 0.00                    | 0.03                      | 0.18                      | 0.53                    | 0.05                     | 0.00                   | 0.00                         | 0.00                          | 0.58                     | 0.33                   |                                  |
| Aug_2025  | MX3082        | 0.00                       | 0.00                   | 0.33                     | 0.00                    | 0.00                    | 0.00                   | 0.10                    | 0.03                      | 0.00                      | 0.00                       | 0.00                      | 0.00                            | 0.00                     | 0.00               | 0.00                      | 0.03                    | 0.00                     | 0.00                | 0.18                     | 0.00                       | 0.05                       | 0.00                       | 0.03                       | 0.85                 | 0.05                    | 0.08                      | 0.93                      | 0.58                    | 0.00                     | 0.00                   | 0.00                         | 0.35                          | 0.15                     |                        |                                  |
